# Supplementary material for: Herpesvirus Exploitation of Host Immune Inhibitory Pathways
Source: PubMed Central journal article supplement (PMC3446756; doi:10.3390/v4081182), 2012-08-03

**Figure 1**

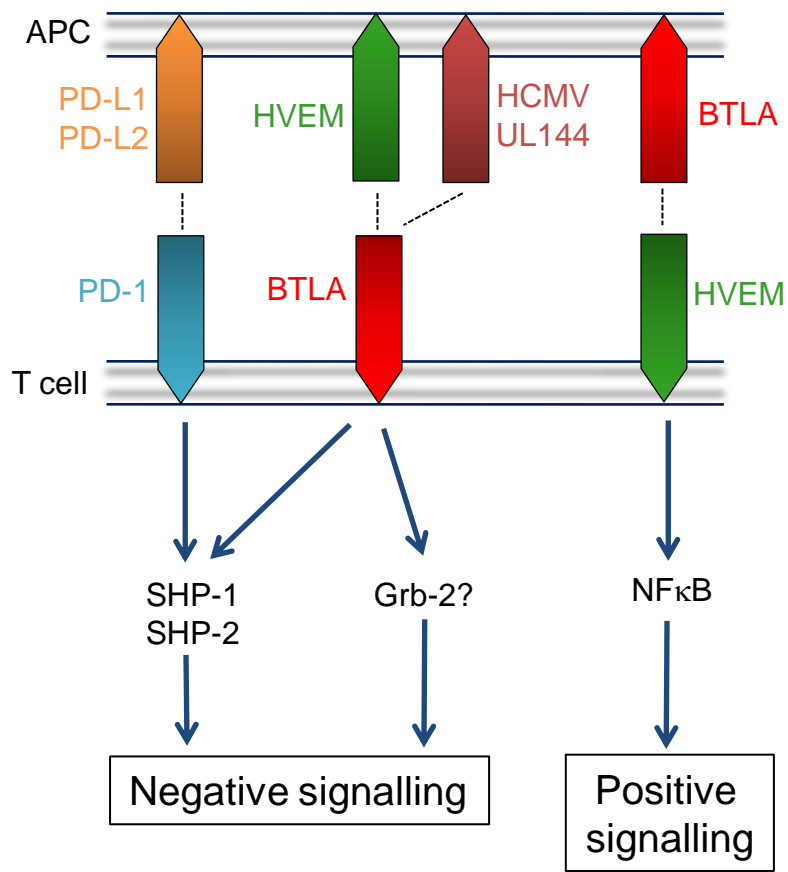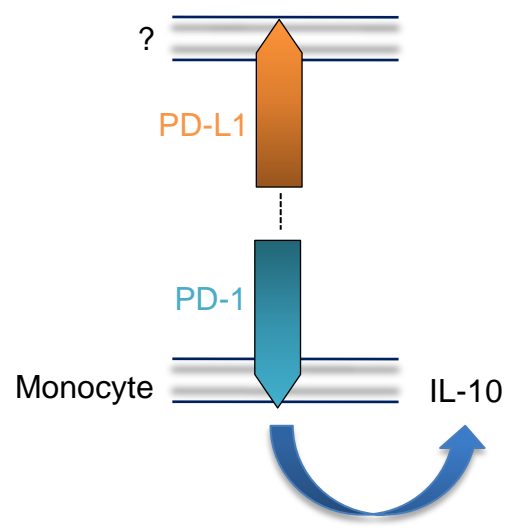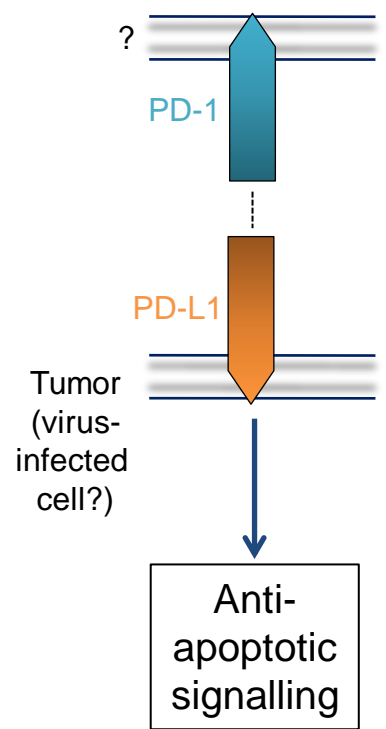

**Figure 2**

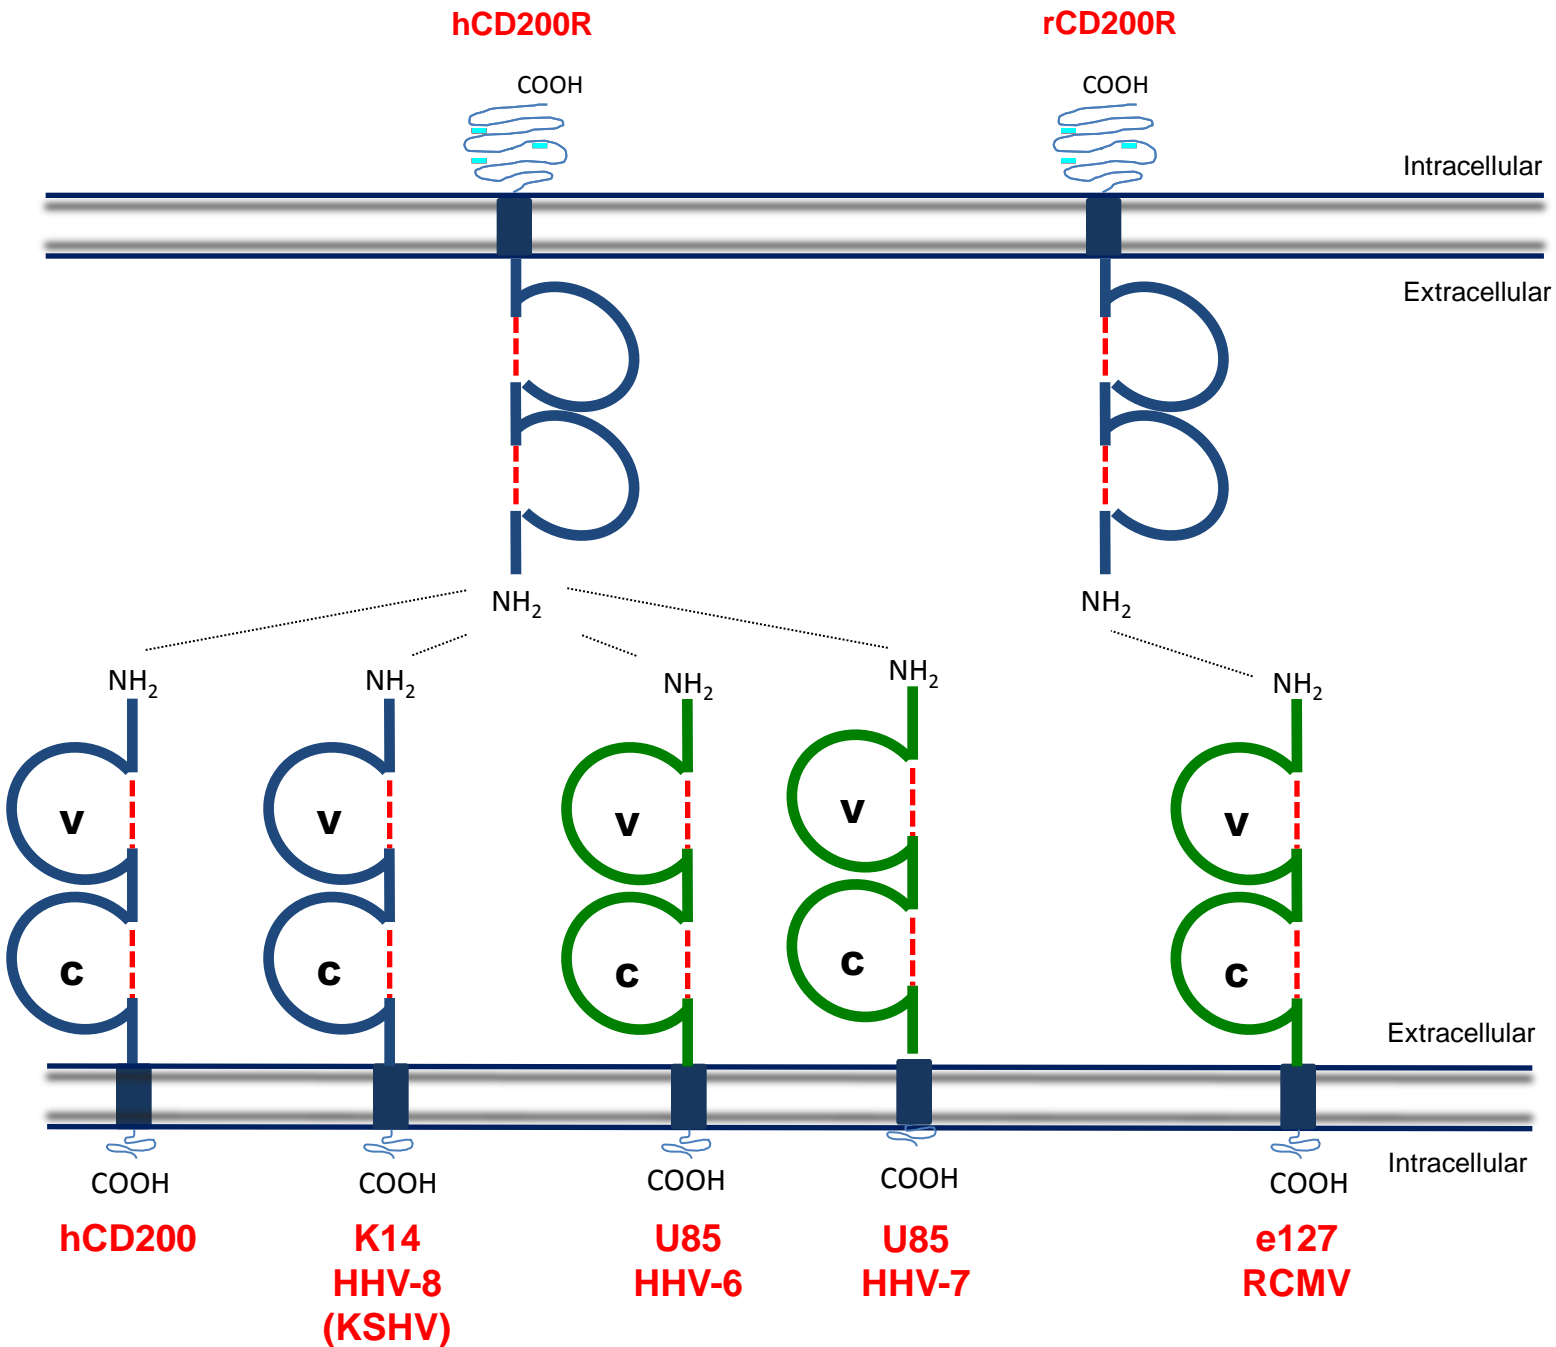

Supplement: viruses-04-01182-s001.pdf [file viruses-04-01182-s001.pdf]
